# Supplementary material for: Effects of Bee Pollen Derived from Acer mono Maxim. or Phellodendron amurense Rupr. on the Lipid Composition of Royal Jelly Secreted by Honeybees
Source: MDPI journal article supplement (doi:10.3390/foods12030625), 2023-02-02
Supplement: s1 [file s1]

**Table S1. Lipidomic profiles**

| Lipid ion              | m/z       | Formula           | Retention time (min) |
|------------------------|-----------|-------------------|----------------------|
| Cer(d14:1_20:0)+CH3COO | 596.52595 | C36 H70 O5 N1     | 14.94                |
| Cer(d14:1_22:0)+CH3COO | 624.55725 | C38 H74 O5 N1     | 16.41                |
| Cer(d16:1_22:0)+CH3COO | 652.58855 | C40 H78 O5 N1     | 17.60                |
| Cer(d18:0_16:0)+CH3COO | 598.54160 | C36 H72 O5 N1     | 15.28                |
| Cer(d18:1_16:0)+CH3COO | 596.52595 | C36 H70 O5 N1     | 14.77                |
| Cer(d18:1_20:0)+CH3COO | 652.58855 | C40 H78 O5 N1     | 17.21                |
| Cer(d18:2_16:0)+CH3COO | 594.51030 | C36 H68 O5 N1     | 14.00                |
| Cer(t18:0_16:0)+CH3COO | 614.53651 | C36 H72 O6 N1     | 14.04                |
| Cer(t18:0_18:0)+CH3COO | 642.56781 | C38 H76 O6 N1     | 15.43                |
| Cer(t18:0_22:0)+CH3COO | 698.63041 | C42 H84 O6 N1     | 18.35                |
| Cer(t18:0_24:0)+CH3COO | 726.66171 | C44 H88 O6 N1     | 19.86                |
| Cer(t18:1_16:0)+CH3COO | 612.52086 | C36 H70 O6 N1     | 13.29                |
| Cer(t18:1_18:0)+CH3COO | 640.55216 | C38 H74 O6 N1     | 14.75                |
| Cer(t18:1_20:0)+CH3COO | 668.58346 | C40 H78 O6 N1     | 16.10                |
| Cer(t18:1_21:0)+CH3COO | 682.59911 | C41 H80 O6 N1     | 16.90                |
| Cer(t18:1_22:0)+CH3COO | 696.61476 | C42 H82 O6 N1     | 17.61                |
| Cer(t18:1_23:0)+CH3COO | 710.63041 | C43 H84 O6 N1     | 18.39                |
| Cer(t18:1_24:0)+CH3COO | 724.64606 | C44 H86 O6 N1     | 19.10                |
| Cer(t18:1_25:0)+CH3COO | 738.66171 | C45 H88 O6 N1     | 19.86                |
| Cer(t18:1_26:0)+CH3COO | 752.67736 | C46 H90 O6 N1     | 20.62                |
| PC(14:0_18:3)+CH3COO   | 786.52906 | C42 H77 O10 N1 P1 | 10.78                |
| PC(16:0_16:0)+CH3COO   | 792.57601 | C42 H83 O10 N1 P1 | 14.62                |
| PC(16:0_18:1)+CH3COO   | 818.59166 | C44 H85 O10 N1 P1 | 14.67                |
| PC(16:0_18:2)+CH3COO   | 816.57601 | C44 H83 O10 N1 P1 | 13.49                |
| PC(16:0_18:3)+CH3COO   | 814.56036 | C44 H81 O10 N1 P1 | 12.31                |
| PC(16:1_18:3)+CH3COO   | 812.54471 | C44 H79 O10 N1 P1 | 11.03                |
| PC(17:0_18:3)+CH3COO   | 828.57601 | C45 H83 O10 N1 P1 | 13.08                |

|                      |           |                   |       |
|----------------------|-----------|-------------------|-------|
| PC(18:0_18:1)+CH3COO | 846.62296 | C46 H89 O10 N1 P1 | 16.12 |
| PC(18:0_18:3)+CH3COO | 842.59166 | C46 H85 O10 N1 P1 | 13.96 |
| PC(18:1_18:1)+CH3COO | 844.60731 | C46 H87 O10 N1 P1 | 14.97 |
| PC(18:1_18:2)+CH3COO | 842.59166 | C46 H85 O10 N1 P1 | 13.43 |
| PC(18:1_18:3)+CH3COO | 840.57601 | C46 H83 O10 N1 P1 | 12.45 |
| PC(18:3_18:2)+CH3COO | 838.56036 | C46 H81 O10 N1 P1 | 11.27 |
| PC(18:3_18:3)+CH3COO | 836.54471 | C46 H79 O10 N1 P1 | 10.24 |
| PE(14:0_18:3)-H      | 684.46098 | C37 H67 O8 N1 P1  | 11.08 |
| PE(15:0_18:3)-H      | 698.47663 | C38 H69 O8 N1 P1  | 11.77 |
| PE(16:0_16:0)-H      | 690.50793 | C37 H73 O8 N1 P1  | 14.61 |
| PE(16:0_18:1)-H      | 716.52358 | C39 H75 O8 N1 P1  | 14.88 |
| PE(16:0_18:2)-H      | 714.50793 | C39 H73 O8 N1 P1  | 13.79 |
| PE(16:0_18:3)-H      | 712.49228 | C39 H71 O8 N1 P1  | 12.74 |
| PE(17:0_18:3)-H      | 726.50793 | C40 H73 O8 N1 P1  | 13.33 |
| PE(18:0_18:1)-H      | 744.55488 | C41 H79 O8 N1 P1  | 16.26 |
| PE(18:0_18:2)-H      | 742.53923 | C41 H77 O8 N1 P1  | 15.18 |
| PE(18:0_18:3)-H      | 740.52358 | C41 H75 O8 N1 P1  | 14.19 |
| PE(18:1_18:1)-H      | 742.53923 | C41 H77 O8 N1 P1  | 14.83 |
| PE(18:2_18:2)-H      | 738.50793 | C41 H73 O8 N1 P1  | 12.77 |
| PE(18:3_18:2)-H      | 736.49228 | C41 H71 O8 N1 P1  | 11.58 |
| PE(18:3_18:3)-H      | 734.47663 | C41 H69 O8 N1 P1  | 10.51 |
| PE(18:3_20:3)-H      | 762.50793 | C43 H73 O8 N1 P1  | 11.83 |
| PE(18:3_22:1)-H      | 794.57053 | C45 H81 O8 N1 P1  | 15.21 |
| PE(18:3_23:0)-H      | 810.60183 | C46 H85 O8 N1 P1  | 17.33 |
| PE(18:3_23:1)-H      | 808.58618 | C46 H83 O8 N1 P1  | 15.91 |
| PE(20:1_18:3)-H      | 766.53923 | C43 H77 O8 N1 P1  | 14.00 |
| PE(22:0_18:2)-H      | 798.60183 | C45 H85 O8 N1 P1  | 17.66 |
| PE(22:0_18:3)-H      | 796.58618 | C45 H83 O8 N1 P1  | 16.66 |
| PE(24:0_18:2)-H      | 826.63313 | C47 H89 O8 N1 P1  | 19.10 |

|                 |           |                  |       |
|-----------------|-----------|------------------|-------|
| PE(24:0_18:3)-H | 824.61748 | C47 H87 O8 N1 P1 | 18.06 |
| PE(24:1_18:2)-H | 824.61748 | C47 H87 O8 N1 P1 | 17.47 |
| PE(24:1_18:3)-H | 822.60183 | C47 H85 O8 N1 P1 | 16.57 |
| SM(34:1)+CH3COO | 761.58143 | C41 H82 O8 N2 P1 | 13.13 |
| SM(36:1)+CH3COO | 789.61273 | C43 H86 O8 N2 P1 | 14.72 |
| SM(38:1)+CH3COO | 817.64403 | C45 H90 O8 N2 P1 | 16.20 |
| FA(10:0)-H      | 171.13850 | C10H19O2         | 1.17  |
| FA(10:1)-H      | 169.12285 | C10H17O2         | 1.06  |
| FA(11:1)-H      | 183.13850 | C11H19O2         | 0.82  |
| FA(12:0)-H      | 199.16981 | C12H23O2         | 1.52  |
| FA(13:1)-H      | 211.16981 | C13H23O2         | 0.92  |
| FA(14:0)-H      | 227.20111 | C14H27O2         | 2.31  |
| FA(15:0)-H      | 241.21676 | C15H29O2         | 2.97  |
| FA(15:4)-H      | 233.15415 | C15H21O2         | 1.47  |
| FA(16:0)-H      | 255.23241 | C16H31O2         | 3.92  |
| FA(16:1)-H      | 253.21676 | C16H29O2         | 2.52  |
| FA(16:2)-H      | 251.20111 | C16H27O2         | 1.86  |
| FA(16:3)-H      | 249.18546 | C16H25O2         | 1.47  |
| FA(17:0)-H      | 269.24806 | C17H33O2         | 5.14  |
| FA(17:1)-H      | 267.23241 | C17H31O2         | 3.25  |
| FA(17:2)-H      | 265.21676 | C17H29O2         | 2.30  |
| FA(17:3)-H      | 263.20111 | C17H27O2         | 1.73  |
| FA(18:0)-H      | 283.26371 | C18H35O2         | 6.58  |
| FA(18:1)-H      | 281.24806 | C18H33O2         | 4.27  |
| FA(18:2)-H      | 279.23241 | C18H31O2         | 2.89  |
| FA(18:3)-H      | 277.21676 | C18H29O2         | 2.15  |
| FA(19:0)-H      | 297.27936 | C19H37O2         | 7.92  |
| FA(20:0)-H      | 311.29501 | C20H39O2         | 9.04  |
| FA(20:1)-H      | 309.27936 | C20H37O2         | 6.88  |

|            |           |          |       |
|------------|-----------|----------|-------|
| FA(20:2)-H | 307.26371 | C20H35O2 | 4.75  |
| FA(20:3)-H | 305.24806 | C20H33O2 | 3.33  |
| FA(20:4)-H | 303.23241 | C20H31O2 | 2.40  |
| FA(20:5)-H | 301.21676 | C20H29O2 | 1.97  |
| FA(20:6)-H | 299.20111 | C20H27O2 | 2.04  |
| FA(21:0)-H | 325.31066 | C21H41O2 | 9.95  |
| FA(21:1)-H | 323.29501 | C21H39O2 | 8.08  |
| FA(22:0)-H | 339.32631 | C22H43O2 | 10.89 |
| FA(22:1)-H | 337.31066 | C22H41O2 | 9.12  |
| FA(22:2)-H | 335.29501 | C22H39O2 | 7.36  |
| FA(22:3)-H | 333.27936 | C22H37O2 | 5.54  |
| FA(23:0)-H | 353.34196 | C23H45O2 | 11.82 |
| FA(23:1)-H | 351.32631 | C23H43O2 | 9.99  |
| FA(23:2)-H | 349.31066 | C23H41O2 | 8.51  |
| FA(24:0)-H | 367.35761 | C24H47O2 | 12.76 |
| FA(24:1)-H | 365.34196 | C24H45O2 | 10.86 |
| FA(24:2)-H | 363.32631 | C24H43O2 | 9.42  |
| FA(24:3)-H | 361.31066 | C24H41O2 | 8.07  |
| FA(24:4)-H | 359.29501 | C24H39O2 | 6.27  |
| FA(25:0)-H | 381.37326 | C25H49O2 | 13.68 |
| FA(26:0)-H | 395.38891 | C26H51O2 | 14.53 |
| FA(26:3)-H | 389.34196 | C26H45O2 | 9.93  |
| FA(27:0)-H | 409.40456 | C27H53O2 | 15.32 |
| FA(28:0)-H | 423.42021 | C28H55O2 | 16.14 |
| FA(29:0)-H | 437.43586 | C29H57O2 | 16.69 |
| FA(30:0)-H | 451.45151 | C30H59O2 | 17.81 |
| FA(30:1)-H | 449.43586 | C30H57O2 | 15.98 |
| FA(30:3)-H | 445.40456 | C30H53O2 | 13.45 |

---
